# Supplementary material for: Fine temporal control of the medium gas content and acidity and on-chip generation of series of oxygen concentrations for cell cultures
Source: Royal Society of Chemistry journal article supplement (doi:10.1039/b816191g), 2009-01-01
Supplement: b816191g.pdf [file b816191g.pdf]

## Supplementary information.

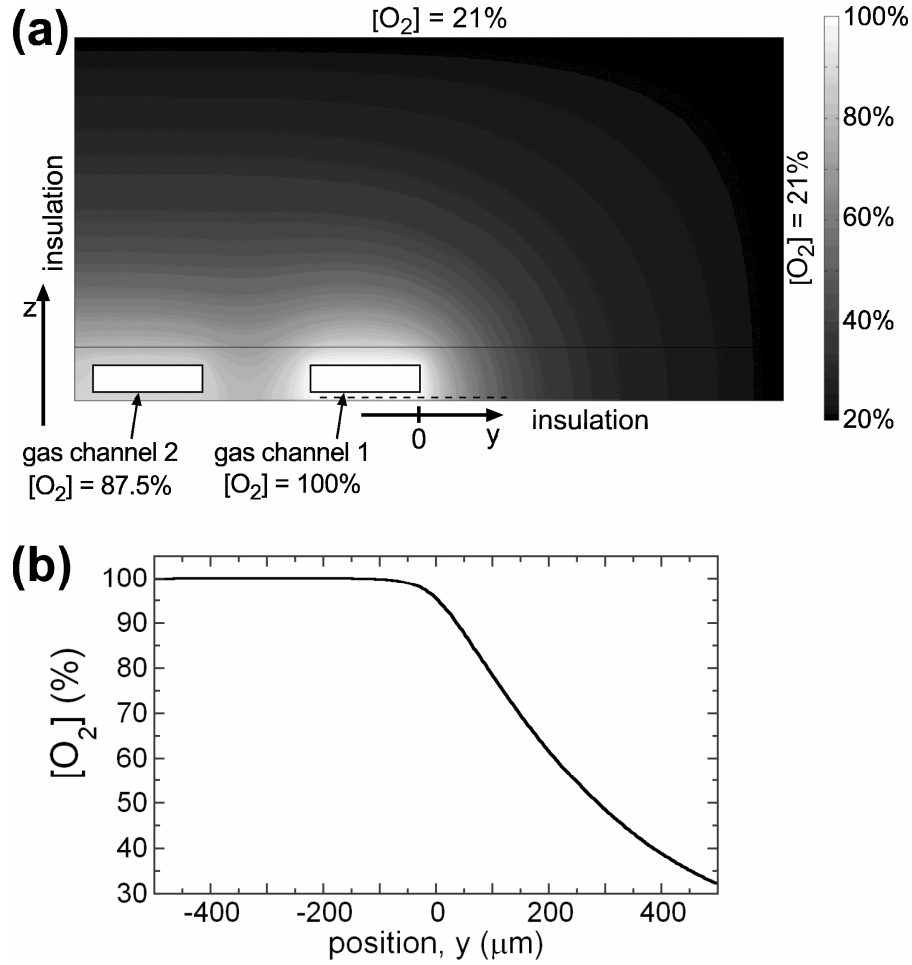

**Figure S-1.** Time-dependent two-dimensional numerical simulation of oxygen concentration,  $[O_2]$ , in a fragment of cross-section of device 1 in  $yz$ -plane. (a) Computational domain,  $3.9 \times 2$  mm in size, with  $[O_2]$  after 1 min coded by a grayscale, as shown by a legend bar on the right. Gas channels 1 and 2, with their boundaries at  $[O_2] = 100\%$  and  $87.5\%$ , respectively, are shown as white rectangles. Boundary conditions are insulation at the bottom (coverglass) and on the left (internal area of the test region) and  $[O_2] = 21\%$  (air) at the top and on the right. (b)  $[O_2]$  under gas test channel 1 at  $5 \mu\text{m}$  above the lower boundary (along the dashed line in panel (a)) as a function of position,  $y$ , with  $y = 0$  corresponding to the right edge of the gas test channel (cf. Figure 3 in the main text).

To obtain an alternative estimate of the difference in  $[O_2]$  between gas channel 1 and the flow channels under it (cf. Figure 3 in the main text), we used FemLab to perform a time-dependent two-dimensional simulation of a fragment of the  $yz$ -cross-section of the device (Figure S-1). The fragment included the gas channels 1 and 2 (cf. Figure 1 in the main text), with the boundary conditions of  $[O_2] = 100\%$  and  $87.5\%$ , respectively (Figure S-1a). The device was simulated as a monolith of PDMS with a  $50 \mu\text{m}$  thick layer between the gas channel and the insulating lower boundary (cover glass) and with  $O_2$  diffusion

coefficient  $D_p = 1.3 \cdot 10^{-5} \text{ cm}^2/\text{s}$ , as evaluated from the gas switching tests (Figure 2 in the main text). The flow channels and the active flow of the liquid through them were not incorporated in the simulation. The initial conditions were  $[\text{O}_2] = 21\%$  everywhere in PDMS and the distribution of  $[\text{O}_2]$  was allowed to evolve for 1 min. The final distribution of  $[\text{O}_2]$  under gas channel 1 (Figure S-1b) had a shape similar to the experimentally obtained distributions of the  $\text{N}_2/\text{O}_2$  fluorescence ratio in Figure 3 in the main text. In particular, in a  $200 \text{ }\mu\text{m}$  wide internal region ( $y$  from  $-400$  to  $-200 \text{ }\mu\text{m}$ ) corresponding to the area of growth chambers in the microfluidic device,  $[\text{O}_2]$  obtained from the simulation was above  $99.9\%$ , which is within  $0.01\%$  of  $[\text{O}_2]$  in the gas channel. Therefore, the simulations indicate that  $[\text{O}_2]$  in the growth chambers of the device is expected to match  $[\text{O}_2]$  in the gas channels very closely.

A conspicuous difference between the experiment and simulations is that at  $y > 0$  the fluorescence intensity ratio in Figure 3 (experiment) decays substantially faster than  $[\text{O}_2]$  in Figure S-1b (simulation). This difference is most likely due to the flow of the RTDP solution in the negative  $y$ -direction, which was not incorporated in the simulation. To estimate the effect of the flow on the  $[\text{O}_2]$  distribution, we first note that because of 6 times higher solubility of  $\text{O}_2$  in PDMS as compared to water, the total  $\text{O}_2$  content of a flow channel with the depth  $h = 6 \text{ }\mu\text{m}$  is equivalent to the  $\text{O}_2$  content of an  $h/6 = 1 \text{ }\mu\text{m}$  layer of PDMS (which is in equilibrium with water in the channel). The characteristic time of equilibration of  $[\text{O}_2]$  in the flow channel with  $[\text{O}_2]$  in the gas channel by diffusion through PDMS with thickness  $d = 50 \text{ }\mu\text{m}$  can thus be estimated as  $\tau' = dh/(6D_p) \approx 38 \text{ msec}$ . The time of  $[\text{O}_2]$  equilibration along the vertical direction in the flow channels, which is estimated as  $h^2/(2D_w) = 9 \text{ msec}$  ( $D_w = 2 \cdot 10^{-5} \text{ cm}^2/\text{s}$  is the diffusion coefficient of  $[\text{O}_2]$  in water), is substantially shorter and can thus be neglected.

For the velocity of  $260 \text{ }\mu\text{m}/\text{s}$  in the flow channel at the driving pressure of 1 psi, the equilibration time of 38 msec corresponds to a distance of  $10 \text{ }\mu\text{m}$  along the flow direction, implying that within a distance of  $200 \text{ }\mu\text{m}$ , the difference in  $[\text{O}_2]$  between the flow and gas channel is expected to become indistinguishable from zero. Therefore, for a driving pressure of 1 psi or less, the contribution of the liquid flow in setting the distribution of  $[\text{O}_2]$  under a gas channel is expected to be small compared with that of the diffusive exchange with the PDMS chip (Figure S-1). Specifically, the flow is not expected to have any appreciable effect on  $[\text{O}_2]$  in the regions with the growth chambers ( $>200 \text{ }\mu\text{m}$  from the gas channel edges). We finally note that the estimated equilibration time  $\tau' = dh/(6D_p) \approx 38 \text{ msec}$  is different from the equilibration time after switching of the gas fed to the gas channel network (Figure 2 in the main text),  $\tau$ , which was measured at 0.8 sec and estimated as  $d^2/(2D_p)$ , because the two equilibration processes are essentially different. In the former case, only  $[\text{O}_2]$  in the aqueous solution is changing as the solution advances along the flow channel, whereas  $[\text{O}_2]$  in the PDMS membrane remains constant. In contrast, in the latter case, the  $\text{O}_2$  content of the PDMS membrane is exchanged, which involves the diffusive transport of  $6d/h = 50$  times larger amount of  $\text{O}_2$ .
